# Supplementary material
Source: Springer Nature journal article supplement (https://www.springermedizin.de/resource/supplementary/12967_2011_845_MOESM3_ESM.pdf/9577170)
Supplement: MOESM3 [file 9577170]

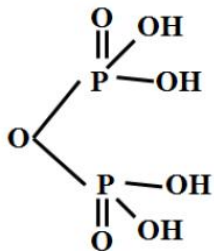

**Pyrophosphate**

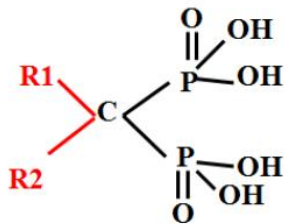

**Bisphosphonate**

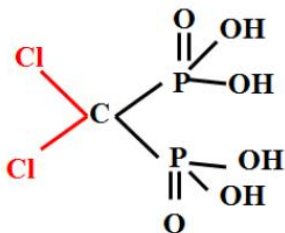

**Clodronate**  
(First generation BP)

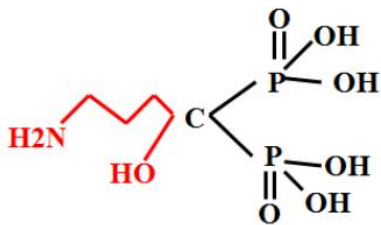

**Alendronate**  
(Second generation N-BP)

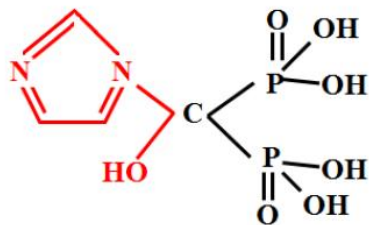

**Zoledronic acid**  
(Third generation N-BP)
